# Supplementary material
Source: HighWire-hosted journal article supplement (https://www.annfammed.org/highwire/filestream/7344/field_highwire_adjunct_files/2/Crosson_Supp_Table.pdf)
Supplement: Crosson_Supp_Table.pdf [file Crosson_Supp_Table.pdf]

**Online Supplementary Material**

Crosson JC, Etz RS, Wu S, Straus SG, Eisenman D, Bell DS. Meaningful use of electronic prescribing in 5 exemplar primary care practices. *Ann Fam Med*. 2011;9(5):392-397.

<http://www.annfammed.org/cgi/content/full/9/5/392/DC1>

---

**Supplemental Table 1. Expert Advisory Committee**

| Name                      | Title, Affiliation                                                                 |
|---------------------------|------------------------------------------------------------------------------------|
| Martha Bernadett, MD, MBA | Executive Vice President, Research and Development, Molina Healthcare, Inc         |
| Kate Berry, MPP           | Executive Director, Center for Improving Medication Management                     |
| John Halamka, MD          | Chairman, New England Health Electronic Data Interchange Network (NEHEN)           |
| Margaret Johnson, RPh     | Executive Pharmacy Director, Horizon Blue Cross Blue Shield of New Jersey          |
| Charles Kennedy, MD       | Vice President, Health Information Technology, Wellpoint, Inc                      |
| Timathie Leslie, BS       | Managing Director, Manatt Health Solutions                                         |
| Anthony Schueth, MS       | Project Manager, Southeast Michigan E-Prescribing Initiative (SEMI)                |
| Matthew Walsh, BBA        | Associate Vice President - Purchaser Initiatives, Health Alliance Plan of Michigan |
| Ajit Dhavle, PharmD, MBA  | SureScripts-RxHub                                                                  |
| Elaine Batchlor, MD, MPH  | Medical Director, L.A. Care Health Plan                                            |
